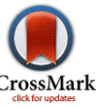

# The Potent Cdc7-Dbf4 (DDK) Kinase Inhibitor XL413 Has Limited Activity in Many Cancer Cell Lines and Discovery of Potential New DDK Inhibitor Scaffolds

Nanda Kumar Sasi<sup>1,2</sup>, Kanchan Tiwari<sup>1</sup>, Fen-Fen Soon<sup>3</sup>, Dorine Bonte<sup>1\*</sup>, Tong Wang<sup>4</sup>, Karsten Melcher<sup>5</sup>, H. Eric Xu<sup>3</sup>, Michael Weinreich<sup>1\*</sup>

**1** Laboratory of Genome Integrity and Tumorigenesis, Van Andel Research Institute (VARI), Grand Rapids, MI, United States of America, **2** Graduate Program in Genetics, Michigan State University, East Lansing, MI, United States of America, **3** Laboratory of Structural Sciences, VARI, Grand Rapids, MI, United States of America, **4** Translational Drug Development, Inc. (TD2), Scottsdale, AZ, United States of America, **5** Laboratory of Structural Biology and Biochemistry, VARI, Grand Rapids, MI, United States of America

## Abstract

Cdc7-Dbf4 kinase or DDK (Dbf4-dependent kinase) is required to initiate DNA replication by phosphorylating and activating the replicative Mcm2-7 DNA helicase. DDK is overexpressed in many tumor cells and is an emerging chemotherapeutic target since DDK inhibition causes apoptosis of diverse cancer cell types but not of normal cells. PHA-767491 and XL413 are among a number of potent DDK inhibitors with low nanomolar IC<sub>50</sub> values against the purified kinase. Although XL413 is highly selective for DDK, its activity has not been extensively characterized on cell lines. We measured anti-proliferative and apoptotic effects of XL413 on a panel of tumor cell lines compared to PHA-767491, whose activity is well characterized. Both compounds were effective biochemical DDK inhibitors but surprisingly, their activities in cell lines were highly divergent. Unlike PHA-767491, XL413 had significant anti-proliferative activity against only one of the ten cell lines tested. Since XL413 did not effectively inhibit DDK in multiple cell lines, this compound likely has limited bioavailability. To identify potential leads for additional DDK inhibitors, we also tested the cross-reactivity of ~400 known kinase inhibitors against DDK using a DDK thermal stability shift assay (TSA). We identified 11 compounds that significantly stabilized DDK. Several inhibited DDK with comparable potency to PHA-767491, including Chk1 and PKR kinase inhibitors, but had divergent chemical scaffolds from known DDK inhibitors. Taken together, these data show that several well-known kinase inhibitors cross-react with DDK and also highlight the opportunity to design additional specific, biologically active DDK inhibitors for use as chemotherapeutic agents.

**Citation:** Sasi NK, Tiwari K, Soon F-F, Bonte D, Wang T, et al. (2014) The Potent Cdc7-Dbf4 (DDK) Kinase Inhibitor XL413 Has Limited Activity in Many Cancer Cell Lines and Discovery of Potential New DDK Inhibitor Scaffolds. *PLoS ONE* 9(11): e113300. doi:10.1371/journal.pone.0113300

**Editor:** Irina V. Lebedeva, Columbia University, United States of America

**Received:** June 30, 2014; **Accepted:** October 23, 2014; **Published:** November 20, 2014

**Copyright:** © 2014 Sasi et al. This is an open-access article distributed under the terms of the Creative Commons Attribution License, which permits unrestricted use, distribution, and reproduction in any medium, provided the original author and source are credited.

**Data Availability:** The authors confirm that all data underlying the findings are fully available without restriction. All relevant data are within the paper and its Supporting Information files.

**Funding:** This work was supported by Van Andel Institute (KM HEX MW) and National Institutes of Health (R01-DK071662 HEX). The funders had no role in study design, data collection and analysis, decision to publish, or preparation of the manuscript.

**Competing Interests:** None of the authors has any relationship with Dr. Tong Wang or the company Translational Drug Development, Inc. other than through Dr. Wang's help devising and coordinating the synthesis of the two compounds the authors used in the study, for which he is a coauthor on this manuscript. There are also no restrictions on sharing data or materials.

\* Email: michael.weinreich@vai.org

‡ Current address: Centre National de la Recherche Scientifique, Institut Gustave Roussy, Villejuif, France, and Université Paris Sud, Orsay, France

## Introduction

The initiation of DNA replication is temporally divided into two phases during the cell cycle. First, an inactive form of the replicative MCM (mini-chromosome maintenance) helicase is loaded onto origin DNA in G1 phase and then activated upon entry into and during S phase by two sets of kinases: cyclin-dependent kinase and Dbf4-dependent kinase (DDK) [1]. DDK is a two-subunit Ser/Thr kinase composed of the Cdc7 kinase and Dbf4 regulatory subunits. DDK mediated phosphorylation of the six-subunit Mcm2-7 (MCM) helicase is thought to bring about a conformational change in its structure leading to helicase activation [2,3]. MCM activation is followed by localized DNA unwinding, recruitment of the replisome machinery and the initiation of bi-directional DNA synthesis [1]. Other functions of

DDK include facilitation of chromosomal segregation in mitosis and meiosis [4,5], the initiation of meiotic recombination [6,7], and activation of DNA repair pathways including trans-lesion DNA repair [8,9].

Cdc7 kinase activity depends on association with its regulatory subunit, Dbf4 [10,11]. Dbf4 is a cell cycle regulated protein whose abundance peaks during S-phase and then is degraded by end of mitosis [12–14]. Interaction with Dbf4 is necessary for Cdc7 ATP binding and substrate recognition [15]. Like all protein kinases, the DDK crystal structure reveals an active site in a deep cleft between the N- and C-terminal lobes [16,17]. The Dbf4 Zn-finger (“motif C”) binds to the N-terminal lobe of DDK and is necessary for human DDK activity but is not essential for budding or fission yeast DDK kinase activity [18–20]. Dbf4 motif M enhances its association with the Cdc7 subunit and is required for the full

activity of the kinase in yeast and humans [16,18,19,21]. DDK phosphorylates multiple subunits of the MCM helicase [22–24] and a recent study in budding yeast indicates that Cdc7 and Dbf4 physically interact with distinct subunits of the Mcm2-7 complex [25].

DDK is over expressed in a number of primary tumors and tumor cell lines [26–32]. DDK over expression has also been associated with poor prognosis in breast cancers [33], advanced clinical stage in ovarian carcinoma [34], and with aggressive phenotype in papillary thyroid carcinomas [35]. Regulating the levels of DDK in tumor cells is an attractive tumor therapeutic strategy. Using neutralizing antibodies, Hunter and colleagues were the first to show that DDK depletion leads to severe disruption of DNA replication in HeLa cells [10]. Using small interfering RNAs, Santocanale and colleagues further showed that DDK depletion led to p53-independent apoptosis in HeLa cells whereas a normal human dermal fibroblast cell line underwent a reversible cell-cycle arrest [36]. HeLa cells were unable to arrest at the G1-S phase transition, progressing through a lethal S phase resulting in cell death via apoptosis. This finding has been corroborated in a number of different cell lines [37–39]. Importantly, tumor cell death induced by depletion of DDK is not accompanied by the induction of known checkpoint markers. Similar cellular responses are seen upon depletion of other components of the replication initiation machinery, including the Cdc6, Cdc45 and Mcm2 subunits [40,41]. The tumor cell specific killing observed by the depletion of DDK has aroused interest as a pharmaceutical target for cancer therapy. Efforts by multiple pharmaceutical companies have led to a number of small molecule DDK inhibitors (Figure 1).

The first well-characterized DDK inhibitor was a pyrrolopyridinone molecule (PHA-767491, Figure 1) [42,43]. It is a potent DDK inhibitor with an  $IC_{50}$  of 10 nM using purified kinase. PHA-767491 is also an effective cell growth inhibitor, with an average  $IC_{50} = 3.14 \mu\text{M}$  among 61 tumor cell lines [43]. PHA-767491 also inhibits purified Cdk9 with an  $IC_{50}$  of 34 nM but is a much less potent inhibitor of many other kinases tested [43]. Hence PHA-767491 is a dual DDK/Cdk9 inhibitor. Recent studies have suggested that inhibition of Cdk9, a kinase that targets RNA Polymerase II, might enhance the apoptotic response induced by PHA-767491 in some cell lines [43–45]. Modifications of this compound led to the identification of several other potent inhibitors of DDK with some exhibiting superior selectivity and sensitivity [46–48]. XL413, a structurally distinct DDK inhibitor, is a benzofuroprymidinone based compound with a reported  $IC_{50}$  of 3.4 nM against purified DDK and inhibits cell-proliferation of Colo-205 cells with an  $IC_{50}$  of 2.69  $\mu\text{M}$  [49]. It was also highly selective for DDK when tested against a panel of 100 kinases [49].

The increased activity and selectivity of XL413 over PHA-767491 was rationalized by the crystal structure of DDK in complex with the two DDK inhibitors [16]. One reason XL413 might be a more specific inhibitor is that it made contacts with three of the most variant residues in the kinase active site when compared to PHA-767491, which interacted with two of these residues. It was therefore unexpected to find that XL413 was not a particularly potent cell growth inhibitor in most of the cell lines we tested, since Cdc7 is essential for cell cycle progression. XL413 inhibited proliferation and induced apoptosis in Colo-205 cells as shown previously [49] but had limited activity in 9 other tumor cell lines tested. Although both compounds are comparable biochemical DDK inhibitors, PHA-767491 exhibited superior activity to XL413 in cell lines. Analysis of DDK-specific Mcm2 phosphorylation levels suggests that XL413 might have poor bioavailability in these and other cancer cell lines. To aid in the

development of additional DDK inhibitors, we tested whether known protein kinase inhibitors (i.e., those not designed to inhibit DDK) exhibited cross-reaction with DDK. We screened ~400 compounds using a thermal stability shift assay (TSA) and identified 12 molecules that shifted the thermal stability of DDK, several with divergent chemical scaffolds and with nearly equivalent potency as PHA-767491. These compounds are therefore unlikely to be highly specific for a single target. Our data highlight the opportunity to design additional specific, biologically active DDK inhibitors for use as chemotherapeutic agents.

## Materials and Methods

### Synthesis of PHA-767491 and XL413

The DDK inhibitors, PHA-767491 and XL413, were synthesized as described previously [42,49]. HPLC analysis and mass spectrometry were performed on both compounds, which confirmed the correct molecular mass and a high level of purity (>99%) for both.

### Cell lines

HeLa cells (ATCC) were cultured in MEM supplemented with Earle's salts, 2 mM glutamine, 10% heat-inactivated fetal bovine serum (HI FBS), 1.5 g/L sodium bicarbonate, 0.1 mM non-essential amino acids, 1 mM sodium pyruvate, 50 units/ml of penicillin, and 50  $\mu\text{g}/\text{ml}$  of streptomycin. MDA-MB-453 (ATCC) cells were grown in DMEM supplemented with 4.5 g/L D-glucose, 4 mM L-glutamine, 110 mg/L sodium pyruvate, 10% HI FBS, 50 units/ml of penicillin, and 50  $\mu\text{g}/\text{ml}$  of streptomycin. HCC1954 (ATCC), HCC1187 (ATCC), BT-549 (NCI-60), MCF-7 (NCI-60), and Colo-205 (NCI-60) cells were all cultured in RPMI 1640 media supplemented with 10% HI FBS, 50 units/ml of penicillin, and 50  $\mu\text{g}/\text{ml}$  of streptomycin. HCT-116 p53<sup>+/+</sup> and p53<sup>-/-</sup> cell lines were cultured in McCoy's 5A medium supplemented with 10% HI FBS, 50 units/ml of penicillin, and 50  $\mu\text{g}/\text{ml}$  of streptomycin. All cells were maintained at 37°C with 5% CO<sub>2</sub> in a humidified incubator.

### DDK protein induction

pKT37 is a pETDuet-1 (Novagen)-vector that co-expresses His6-Smt3-HsCdc7 (codon optimized, Genescript) and Dbf4 residues 341–674, which contains motifs M and C required to bind and activate Cdc7. *E. coli* BL21-RIPL was transformed with pKT37 and a fresh colony was grown overnight in LB containing 150  $\mu\text{g}/\text{ml}$  ampicillin, 50  $\mu\text{g}/\text{ml}$  chloramphenicol and 1% glucose. Two liters of LB containing 150  $\mu\text{g}/\text{ml}$  ampicillin and 50  $\mu\text{g}/\text{ml}$  chloramphenicol were inoculated with ~60 ml of overnight culture to give an OD<sub>600</sub> of 0.1. The culture was grown to an OD<sub>600</sub> of 0.8 and then induced for 6 hrs with 0.5 mM IPTG, at 25°C. The cell pellet was suspended in 20 ml Ni-NTA buffer A (20 mM HEPES-NaOH (pH 7.4), 250 mM NaCl, 10% glycerol) with 1X protease inhibitor cocktail (Roche) and 1 mM  $\beta$ -mercaptoethanol. A micro fluidizer was used to lyse the cells, followed by a 30 minute centrifugation (12,000 rpm, F13 rotor) at 4°C.

### DDK purification

DDK was purified step-wise using Nickel-NTA, SP Fast Flow, and S-200 columns. The cell lysate containing 35 mM imidazole was applied to a 25 ml Ni-NTA column, washed with 20 column volumes, and then eluted with a 250 ml 35 mM–150 mM imidazole gradient. DDK protein fractions (~115 mM imidazole) were pooled and dialyzed overnight at 4°C against 20 mM

| Structure                                                                           | IUPAC Chemical Name                                                                             | DDK IC <sub>50</sub> (in vitro) | Cellular Proliferation IC <sub>50</sub>           | Company                          |
|-------------------------------------------------------------------------------------|-------------------------------------------------------------------------------------------------|---------------------------------|---------------------------------------------------|----------------------------------|
| 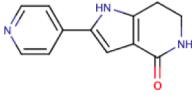   | 2-(pyridin-4-yl)-1,5,6,7-tetrahydro-pyrrolo[3,2-c]pyridin-4-one                                 | 10nM                            | 3.17μM (average from 61 human cell lines) [42,43] | Nerviano Medical Sciences, Italy |
|    | [(S)-2-(2-aminopyrimidin-4-yl)-7-(2-fluoro-ethyl)-1,5,6,7-tetrahydropyrrolo[3,2-c]pyridin-4-one | 2nM                             | 1.53μM (average from 12 human cell lines) [46]    | Nerviano Medical Sciences, Italy |
|    | (5Z)-2-(Benzylamino)-5-(1H-pyrrolo[2,3-b]pyridin-3-ylmethylene)-1,3-thiazol-4(5H)-one           | 9nM                             | 0.32μM (on A2780 cell line) [47]                  | Nerviano Medical Sciences, Italy |
|    | 5-(2-Amino-pyrimidin-4-yl)-2-phenyl-1H-pyrrole-3-carboxamide                                    | 22nM                            | 5.44μM (average from 16 human cell lines) [48]    | Nerviano Medical Sciences, Italy |
|   | 7,9-dimethyl-8-prop-2-enylpyrido[2,3]thieno[2,4-d]pyrimidin-4-amine                             | 20nM                            | 8.2μM (average from 3 human cell lines) [63]      | Roche, USA                       |
|  | (S)-8-chloro-2-(pyrrolidin-2-yl)benzofuro[3,2-d]pyrimidin-4(3H)-one                             | 3.4nM                           | 2.7μM (Colo-205) [49]                             | Exelixis, USA                    |
|  | 1-(6-aminopyrimidin-4-yl)pyrrolo[2,3-b]pyridine-6-carbonitrile                                  | 9nM                             | NA [64]                                           | Amgen, USA                       |

**Figure 1. DDK inhibitors synthesized by various pharmaceutical companies.**  
doi:10.1371/journal.pone.0113300.g001

HEPES-NaOH, pH 7.4, 1 mM EDTA, 10% glycerol with no imidazole. The dialysate was then passed over three 5 ml SP Fast Flow columns (connected in tandem), washed and eluted with a 100 ml 100 mM-0.5 M NaCl gradient. DDK protein fractions (~0.2 M) were pooled, MgCl<sub>2</sub> was added to the pooled protein to chelate EDTA, and incubated with PP2C (6His-GST-Hab1) phosphatase using an equivalent milligram amount to the total protein in the pool, and 1/100 equivalent milligram amount of Ulp1 protease to cleave the His6-Smt3 (Sumo) tag at 16°C overnight. DDK was analyzed on 15% SDS gel to check the extent of dephosphorylation and Sumo cleavage (which was usually greater than 95%). The protein pool was loaded onto a second Ni-NTA column (with no imidazole) and flow through fractions containing DDK were pooled, 1 mM EDTA was added

to chelate free Ni<sup>2+</sup>, and dialyzed overnight at 4°C against 20 mM HEPES(pH 7.4), 100 mM NaCl, 1 mM EDTA. The protein was concentrated using 30,000 MWCO spin concentrator (Amicon Ultra, Millipore) at 4°C to a final volume of 10 ml. Concentrated protein was loaded onto a 300 ml S-200 gel exclusion column (Amersham-Pharmacia). HsCdc7-Dbf4 eluted at ~150 kDa, close to the dimer value of 110 kDa. Total yield was typically 6 to 8 mg.

#### *In vitro* kinase activation assays

20 ng of purified human DDK was pre-incubated with increasing concentrations of each DDK inhibitor for 5 min. Then 10 μCi (γ)-<sup>32</sup>P ATP and 1.5 μM cold ATP were added in a buffer containing 50 mM Tris-HCl (pH 7.5), 10 mM MgCl<sub>2</sub>, and 1 mM DTT and incubated for 30 min at 30°C. The proteins were

denatured in 1X Laemmli buffer at 100°C followed by SDS-PAGE and autoradiography on HyBlot CL film (Denville Scientific, Inc.). Auto-phosphorylation of DDK was used as an indicator of its kinase activity. <sup>32</sup>P-labeled bands were quantified using ImageJ and the IC<sub>50</sub> values were calculated using GraphPad (Prism 6).

### Analysis of cell viability

For assays in 96 well plates 2500 cells were plated per well. After 24 hours, cells were treated with small molecule inhibitors and incubated for 72 hours at 37°C. Subsequently the cells were lysed and the ATP content was measured as an indicator of metabolically active cells using the CellTiter-Glo assay (Promega). IC<sub>50</sub> values were calculated using the GraphPad software. For assays in six well plates, 100,000 cells were plated per well. After 24 hours, cells were treated with small molecule inhibitors and incubated for varying time points. Cells were trypsinized and a suspension was made in 5 ml of phosphate buffered saline. 30 µl of this suspension was mixed with 30 µl of CellTiter-Glo reagent followed by a 10-minute incubation at room temperature. Luminescence was measured using EnVision 2104 Multilabel Reader (PerkinElmer) and BioTek Synergy Neo Microplate Reader.

### Analysis of Caspase 3/7 activity

5,000 cells per well were plated in a 96 well plate. After 24 hours, cells were treated with small molecule inhibitors and incubated for 24 hours at 37°C. Caspase 3/7 activity and viable cell number were then measured using the Caspase-Glo 3/7 assay (Promega) and CellTiter-Glo assay (Promega), respectively. The “Caspase activity per cell” was obtained by normalizing total Caspase activity to cell number.

### Immunoblot Analysis

Whole cell extracts were prepared by re-suspending the pellets in RIPA buffer (150 mM NaCl, 1% NP-40, 0.5% sodium deoxycholate, 0.1% SDS, 50 mM Tris HCl, pH 8) containing protease inhibitors (100 µM PMSF, 1 mM Benzamide, 2.5 µg/ml Pepstatin A, 10 µg/ml Leupeptin, and 10 µg/ml Aprotinin) and phosphatase inhibitors (1 mM each NaF, Na<sub>3</sub>VO<sub>4</sub> and Na<sub>4</sub>P<sub>2</sub>O<sub>7</sub>). Protein concentration was measured using the BCA protein assay kit (Pierce) according to manufacturer’s protocol. Equal amounts of protein were subjected to SDS-PAGE and transferred to a nitrocellulose membrane (Millipore). Transfer efficiency and equal loading was confirmed by Ponceau S staining. Following primary and secondary antibody treatments, proteins were visualized using SuperSignal West Pico solutions (Thermo Scientific). Anti-Mcm2 and anti-S53-phospho-Mcm2 antibodies were purchased from Bethyl Laboratories; anti-β-actin was from Sigma; anti-mouse and anti-rabbit HRP antibodies were from GE Healthcare; and anti-Cdc7 and anti-Dbf4 antibodies were described previously [26].

### Thermal Stability Shift Assay (TSA)

All reactions were incubated in a 10 µl final volume and assayed in 96-well plates using 20 x SYPRO Orange (Invitrogen) and 200 µg/ml purified DDK [50]. Reactions were incubated with inhibitor compounds on ice for 30 minutes. Compounds from four kinase inhibitor libraries (Calbiochem I, II, III, Toctriscreen Inhibitor Toolbox) were screened at 20 µM for T<sub>m</sub> increases with a total DMSO concentration of 2% or less. Thermal melting experiments were carried out using the StepOnePlus Real-Time PCR System (Applied Biosystems) melt curve program with a ramp rate of 1°C and temperature range of 15°C to 85°C.

Subsequent TSAs on the 12 hits obtained were carried out as above but in triplicate and using a 200-fold range of inhibitor concentrations. Data analysis was performed as described [50]. Melting temperatures (T<sub>m</sub>) were calculated by fitting the sigmoidal melt curve to the Boltzmann equation using GraphPad Prism, with R<sup>2</sup> values of >0.99. The difference in T<sub>m</sub> values calculated for reactions with and without compounds is ΔT<sub>m</sub>.

## Results

### DDK inhibitors exhibit very different cellular potencies

We screened a panel of 15 breast cancer cell lines for Cdc7 and Dbf4 expression using monoclonal antibodies against each subunit [26]. The majority of these express the DDK subunits equivalent to or higher than MCF10A, an immortalized but non-tumorigenic mammary epithelial cell line that served as a non-tumor control (Figure 2). We used PHA-767491 and XL413 to inhibit DDK in a panel of six breast cancer cell lines that overexpress DDK at various levels (marked with asterisks in Figure 2). Both compounds have been reported to have anti-proliferative activities in the low micromolar range [43,49]. As controls, we compared these results to PHA-767491 treatment of HeLa cells and XL413 treatment of Colo-205 cells, which inhibit DDK and induce cell death. Since Cdc7 kinase is an essential protein, inhibiting its activity should significantly slow or arrest cell proliferation. PHA-767491 significantly inhibited proliferation in all cell lines tested (Figure 3A, values are plotted relative to vehicle controls). PHA-767491 was most effective on the HeLa and HCC1187 cell lines and had the least effect on the MCF-7 [43] and the MDA-MB-453 cell lines: 2-fold and 2.5-fold inhibited, respectively. In contrast, XL413 was anti-proliferative only in the Colo-205 cells (Figure 3A).

We then examined the potency profiles of both compounds in more detail using the XL413-sensitive (Colo-205) and XL413-resistant (HCC1954) cell lines. Cells were incubated in presence of increasing concentrations of the inhibitors for 72 hours at 37°C followed by cell viability measurements. PHA-767491 inhibited proliferation in both cell lines with an IC<sub>50</sub> of 0.64 µM in HCC1954 cells and 1.3 µM in Colo-205 cells (Figure 3, B and D), consistent with the average 3.17 µM IC<sub>50</sub> value calculated using a panel of 61 tumor cell lines [43]. In contrast, XL413 had an IC<sub>50</sub> of 22.9 µM in HCC1954 cells and 1.1 µM in Colo-205 cells (Figure 3, B and D). In correspondence with the viability data, PHA-767491 induced apoptosis in both the HCC1954 and Colo-205 cells, but XL413 induced apoptosis only in the Colo-205 cells (Figure 2, C and E). XL413 was not a specific inhibitor of colorectal tumor lines because it had limited effects on two additional colorectal tumor cell lines: XL413 had 40- to 60-fold higher IC<sub>50</sub> values than PHA-767491 on these lines (Figure S1 in File S1).

### PHA-767491 and XL413 are potent DDK inhibitors *in vitro*

The poor potency of XL413 on most tumor cell lines could be because the synthesized compound is not an effective kinase inhibitor. To test this possibility, we purified recombinant DDK and then measured the IC<sub>50</sub> values of both XL413 and PHA-767491 on purified kinase. We co-expressed His6-SUMO-Cdc7 and Dbf4 in bacterial cells and then purified the complex as described in Materials and Methods. Briefly, DDK was bound to a Ni-NTA column followed by elution and removal of the His6-SUMO tag. Untagged DDK was then fractionated over an SP Fast Flow column followed by separation on an S-200 gel filtration column. Kinase assays were performed with purified DDK (Figure 4A) in the presence of increasing concentrations of each

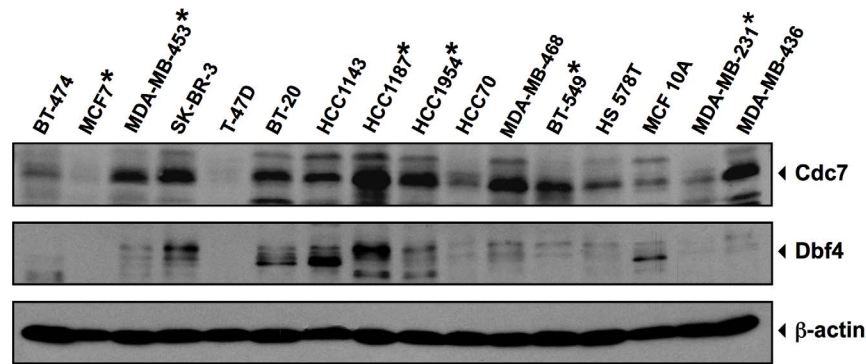

**Figure 2. DDK is overexpressed in multiple breast cancer cell lines.** Immunoblots showing the expression levels of Cdc7 and Dbf4 in tumor cell lines.  $\beta$ -actin levels indicate equal loading of proteins.  
doi:10.1371/journal.pone.0113300.g002

inhibitor (Figure 4, B and C). Both PHA-767491 and XL413 were effective DDK inhibitors *in vitro* as shown previously [16,42,49] with  $IC_{50}$  values of 18.6 nM and 22.7 nM, respectively. Since both compounds are effective DDK inhibitors, the relative cell viability profiles indicate that XL413 is deficient in acting on its target inside the cell.

#### XL413 is defective in inhibiting DDK-dependent Mcm2 phosphorylation in HCC1954 cells

Effective cellular uptake of the DDK inhibitor should compromise DDK activity *in vivo*. Among the many targets of DDK are components of the replicative Mcm2–7 helicase. Serine 53 of Mcm2 subunit is a well-characterized target site for DDK mediated phosphorylation [24]. We quantitated levels of phosphorylation on this site as a measure of DDK activity *in vivo*. HCC1954 cells were incubated in presence of 1  $\mu$ M PHA-767491, 2  $\mu$ M PHA-767491 or 5  $\mu$ M XL413. Cells were then harvested at 0, 24, 48, and 72 hours post drug addition to measure viable cells and Mcm2 phosphorylation by immunoblotting.

2  $\mu$ M PHA-767491 completely abolished Mcm2 phosphorylation by 24 hours in HCC1954 cells (Figure 5A), corresponding with its affect on cell growth and viability (Figure 5B). In the same cell line, 1  $\mu$ M PHA-767491 resulted in very little residual Mcm2 phosphorylation from 24 to 72 hours and was also effective in inhibiting cell viability and inducing cell death. In contrast, XL413 did not inhibit Mcm2 phosphorylation at 24 hrs, even at a higher concentration of 5  $\mu$ M (Figure 5A) and there was only a modest decrease in Mcm2 phosphorylation at 72 hours. This effect was also seen in the cell viability assay, where XL413 treated cells grew only slightly poorer than the vehicle treated cells (Figure 5B).

Since both compounds were effective inhibitors in the Colo-205 cells, we examined Mcm2 phosphorylation in these cells following drug addition. Again, 5  $\mu$ M PHA-767491 completely abolished Mcm2 phosphorylation by 24 hours and was very effective in inducing cell death (Figure 5, C and D). However, unlike in HCC1954 cells, XL413 was a very effective inhibitor of DDK activity in Colo-205 cells. 5  $\mu$ M of XL413 completely abolished Mcm2 phosphorylation at 24 hrs and was also as effective as PHA-767491 in inducing cell death (Figure 5, C and D). These results show that the two DDK inhibitors exhibit very different profiles in cell lines despite the fact that both compounds are highly effective kinase inhibitors *in vitro*. Our data suggest that XL413 is not taken up effectively into many cell lines or is metabolized quickly or modified to an inactive form.

#### Screen to determine cross reactivity of known kinase inhibitors with DDK

To identify additional chemical structures that are capable of inhibiting DDK, we tested a panel of  $\sim$ 400 kinase inhibitors against purified DDK in a thermal stability shift assay (TSA) [50]. In this assay, inhibitor compounds were incubated with purified DDK and then screened with an increasing temperature gradient to determine the point at which they denature (relative to DDK alone) by following fluorescence changes of the dye SYPRO Orange, which binds to hydrophobic surfaces on unfolded proteins. Inhibitor compounds that bind within the DDK ATP binding pocket are predicted to stabilize the kinase, and  $\Delta T_m$  values (see Materials and Methods) of 2°C or greater are considered significant hits. Experimental results of the 400 compound screen are listed in Figure S2 in File S1. We identified 12 compounds that caused significant temperature shifts: 11 compounds increased the  $T_m$ , and 1 compound (Genistein) decreased the  $T_m$  (Table S1 in File S1).

To estimate the affinity of each compound for DDK we measured  $\Delta T_m$  values for these 12 compounds across a 200-fold range of inhibitor concentrations and compared these values to PHA-767491 (a specific DDK inhibitor), staurosporine (a broad spectrum protein kinase inhibitor), and DMSO as a vehicle control. The data shown in Figure 6 represent an average of three independent measurements. The compound genistein, which is an EGFR inhibitor, was unusual in that it increased  $\Delta T_m$  at lower inhibitor concentrations and then decreased  $\Delta T_m$  at 5, 10 and 20  $\mu$ M concentrations. The initial screen was carried out with 20  $\mu$ M inhibitor and explains why genistein was scored as decreasing the  $T_m$ . Perhaps this compound binds to the DDK ATP binding pocket but at higher concentrations disrupts Cdc7-Dbf4 binding. Each of the other 11 compounds has positive  $\Delta T_m$ s. Examination of the compound titrations reveals that three inhibitors had comparable profiles to PHA-767491 in that they induced a  $\Delta T_m$  of  $\sim$ 2 or more beginning at a 1  $\mu$ M concentration: a Rho kinase inhibitor (Rockout), a protein kinase R (PKR) inhibitor, and a Chk1 kinase inhibitor (SB218078). Four additional compounds, the JAK3 inhibitor VI, PI3-K $\alpha$  inhibitor VIII, UCN-01, and K-252a gave a 3-fold or higher  $\Delta T_m$  at 5, 10 and 20  $\mu$ M concentrations.

The structures of the top compounds in the TSA screen are shown in Figure 7, revealing a broad range of structural classes. K-252a is naturally occurring alkaloid related to staurosporine that inhibits a broad variety of protein kinases including serine/threonine kinases and tyrosine kinases of the Trk family [51,52]. So, inclusion of K-252a in this list (like staurosporine) is perhaps

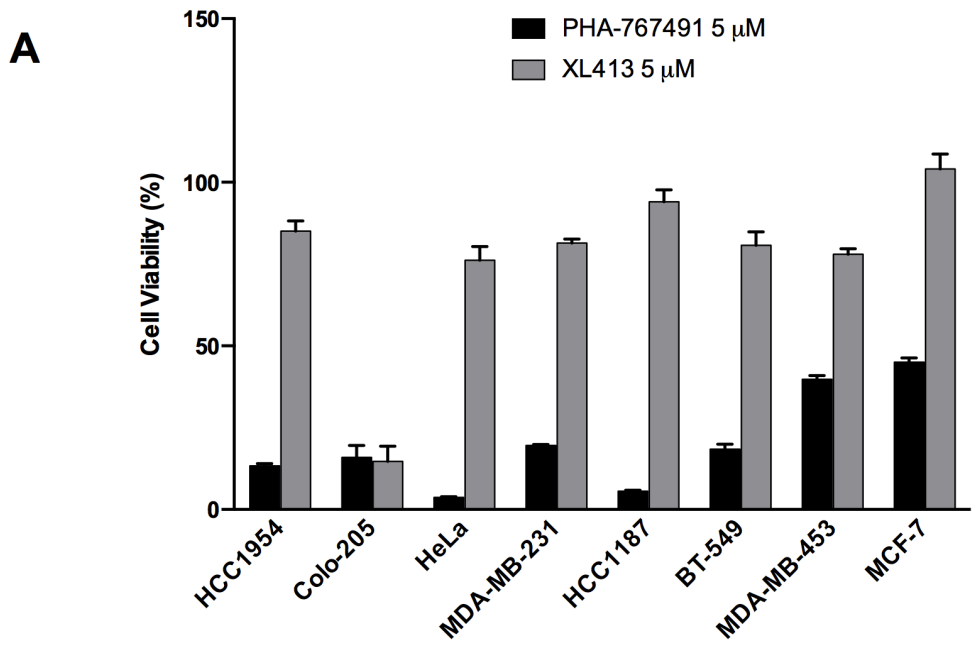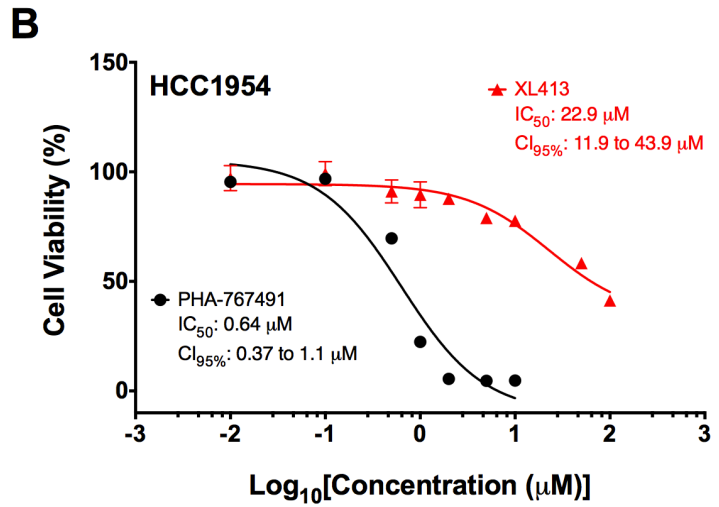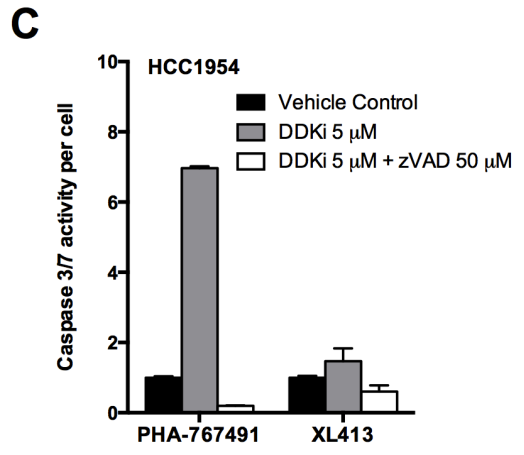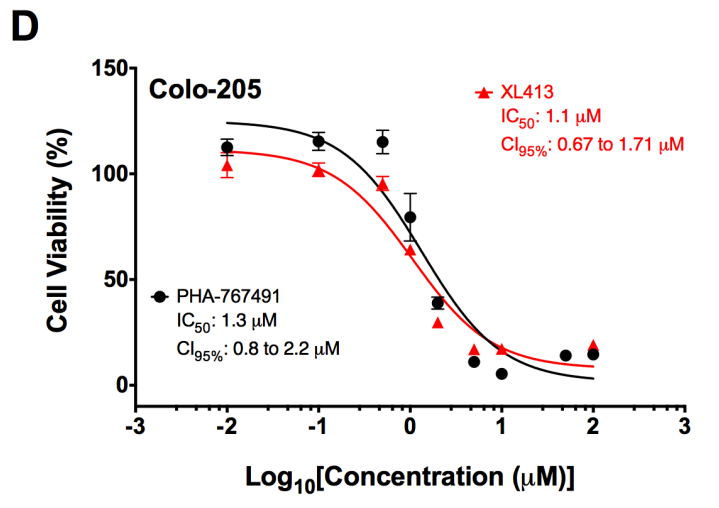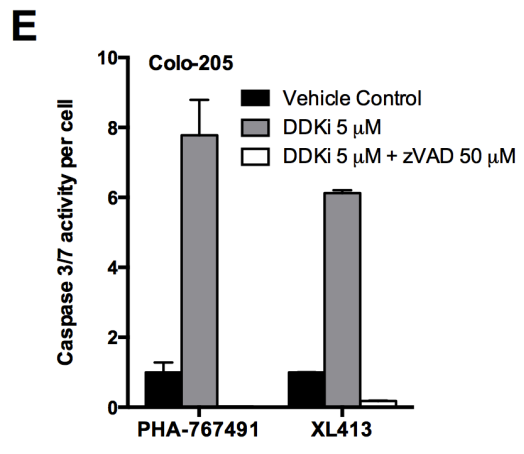

**Figure 3. Two DDK inhibitors, PHA-767491 and XL413, exhibit differential activity against cultured tumor cells.** (A) Eight tumor cell lines were treated with 5  $\mu\text{M}$  of each DDK inhibitor and cell viability was measured 72 hrs post drug addition. To determine the  $\text{IC}_{50}$  values, HCC1954 cells were treated with increasing concentrations of PHA-767491 or XL413 (B) and the cell viability was measured 72 hrs post drug addition. Colo-205 cells were treated with increasing concentrations of PHA-767491 or XL413 (D) and the cell viability was measured 72 hrs post drug addition. The extent of apoptosis induced by the compounds in each cell line relative to vehicle control was measured by Caspase 3/7 activity and is indicated in (C, E). All data represent the mean of at least three separate measurements  $\pm$  SD and were highly reproducible on separate days. doi:10.1371/journal.pone.0113300.g003

not surprising. Since it is very likely that the inhibitors we recovered in the TSA screen stabilize DDK by their ability to bind in the ATP binding pocket and inhibit DDK, we performed kinase assays using the top six compounds. Kinase assays revealed that they are indeed DDK inhibitors (Figure S3 in File S1). The Chk1 (SB218078) and the PKR inhibitors were the best compounds *in vitro* and inhibited DDK with  $\text{IC}_{50}$ s of 19.3 nM and 67.5 nM, respectively (Figure 8A and Figure S3 in File S1). Interestingly, the  $\Delta T_m$  profiles of the Chk1 and PKR inhibitors look strikingly like PHA-767491, raising the possibility that these compounds inhibit DDK in cells. Although SB218078 is derived from staurosporine, it is a potent inhibitor of Chk1 [53]. The structures of the other top hits, the PKR inhibitor and Rockout, are not derived from staurosporine and also differ from known DDK inhibitors (Figure 1).

We tested whether the PKR and Chk1 inhibitors would alter cell growth and inhibit Mcm2 phosphorylation in the HCC1954 breast cancer cell line, which would be strong evidence that they inhibit DDK in cells. Increasing amounts of the PKR inhibitor were incubated with HCC1954 cells over 72 hours, which resulted in a large decrease in the number of viable cells relative to vehicle control (Figure 8B,  $\text{IC}_{50}$  of 1.7  $\mu\text{M}$ ). The large decrease in cell viability was likely the result of significant apoptosis because 2  $\mu\text{M}$  PKR inhibitor increased Caspase 3/7 activity 20-fold relative to the DMSO control and this was blocked by the pan-caspase inhibitor z-VAD (Figure 8C). 2  $\mu\text{M}$  PKR inhibitor impaired cell growth over a 72 hour time course similar to 2  $\mu\text{M}$  PHA-767491 (Figure 8D) and also strongly inhibited Mcm2 phosphorylation in the HCC1954 cells (Figure 8E). These results strongly suggest that the PKR inhibitor is blocking DDK activity in this cell line. We saw the same trend with the Chk1 inhibitor, although it had a reduced ability to block cell growth, induce apoptosis, and inhibit Mcm2 phosphorylation relative to the PKR and PHA-767491 inhibitors (Figure S4 in File S1).

## Discussion

Small molecule inhibitors have been successfully employed both in the clinic and laboratory. Despite being initially regarded as too non-specific for deployment in therapy, small molecule kinase inhibitors have emerged as frontrunners in drug development, especially against cancer [54]. Clinically useful molecules are often called ‘drugs’ while the ones used for studying protein functions in the laboratory are called ‘chemical probes’ [55,56]. Both the groups share a basic requirement of high potency against the target of interest. While drugs need to act effectively against the targeted disease and exhibit good pharmacokinetic properties in a physiological setting [56], for chemical probes target specificity is of paramount importance [55]. Small molecule inhibitors of DDK are attractive both as drugs as well as chemical probes.

Since the initial description of the tumor specific cell killing observed in response to depletion of DDK, several DDK inhibitors have been synthesized. Very different families of chemical moieties have been shown to exhibit DDK inhibitory activities. Nerviano Medical Sciences, Roche, Abbot, Exelixis, and Amgen have developed and characterized DDK inhibitors. Although DDK inhibitors may be effective anti-cancer drugs, these molecules are

also very important for understanding the roles of this multifunctional kinase. As probes, DDK inhibitors would complement the traditional RNAi techniques, which can also have off-target effects [57]. RNAi mediated silencing leads to a gradual loss of protein whereas an inhibitor impacts kinase activity and not necessarily protein abundance [57]. Chemical inhibitors could also be important in studying the non-kinase roles of DDK.

Two inhibitors of DDK have received more characterization than others: the first was the prototype DDK inhibitor PHA-76749 followed by the highly selective benzofuroprymidinone XL413. An X-ray crystal structure of DDK in association with both DDK inhibitors has been solved recently [16]. The tighter binding of XL413 in the binding pocket of DDK along with its more extensive associations with the non-conserved residues of the active site is thought to be the reason for the superior selectivity profile of XL413. The cellular potency data provided with the initial characterization of XL413 [49] along with the crystal structure evidence made it the best in class DDK inhibitor. XL413 seemed an ideal chemical probe for studies of DDK function in normal and in tumor cells.

It was therefore surprising that in most cell lines we tested XL413 fared very poorly when compared to PHA-767491. This led us to perform a comparative analysis of the biochemical characteristics of both inhibitors. Both inhibitors were quite effective in inhibiting purified DDK complex *in vitro*. Although the cancer cell lines had varying levels of DDK, they all responded well to PHA-767491. XL413, however, had almost no effect on nine of the ten cell lines in our panel. It also did not induce cell cycle arrest in majority of cell lines, indicating that DDK activity was not being inhibited *in vivo*. This was corroborated by the Mcm2 phosphorylation analysis in XL413-sensitive Colo-205 cells and XL413-resistant HCC1954 cells. The majority of the original cellular potency profile for XL413 was provided with one cell line, Colo-205. In our analysis, Colo-205 was the sole cell line highly responsive to XL413. Taken together, our analyses suggest that XL413, while exhibiting impressive chemical characteristics and selectivity, is a poor chemical probe for cell lines.

As described by Workman and Collins [55], the effectiveness of an inhibitor as a chemical probe is dependent on its (1) chemical properties (2) biological potency (3) biological selectivity and (4) its context of use. Since XL413 is a product of a high throughput drug-screening program and must have satisfied multiple criteria for selection as lead compound, it is expected to exhibit good pharmacokinetic properties. XL413 was shown to be a highly potent inhibitor with  $\text{IC}_{50}$  values in single digit nanomolar range. Moreover, it was highly selective for DDK over a panel of 100 kinases. With such properties, the poor growth suppressive properties of XL413 among so many cell lines cannot be easily explained. We also performed analyses with XL413 purchased from a separate commercial supplier, MedKoo Inc, however this compound had identical cellular potency profiles as the compound synthesized by CGeneTech (Figure S5 in File S1). Both HCC1954 and Colo-205 cells were cultured in RPMI-1640 media supplemented with 10% fetal bovine serum. Since, the inhibitor functions well in Colo-205 cells, precipitation of XL413 in media cannot be the reason for its inactivity. Possible reasons for its

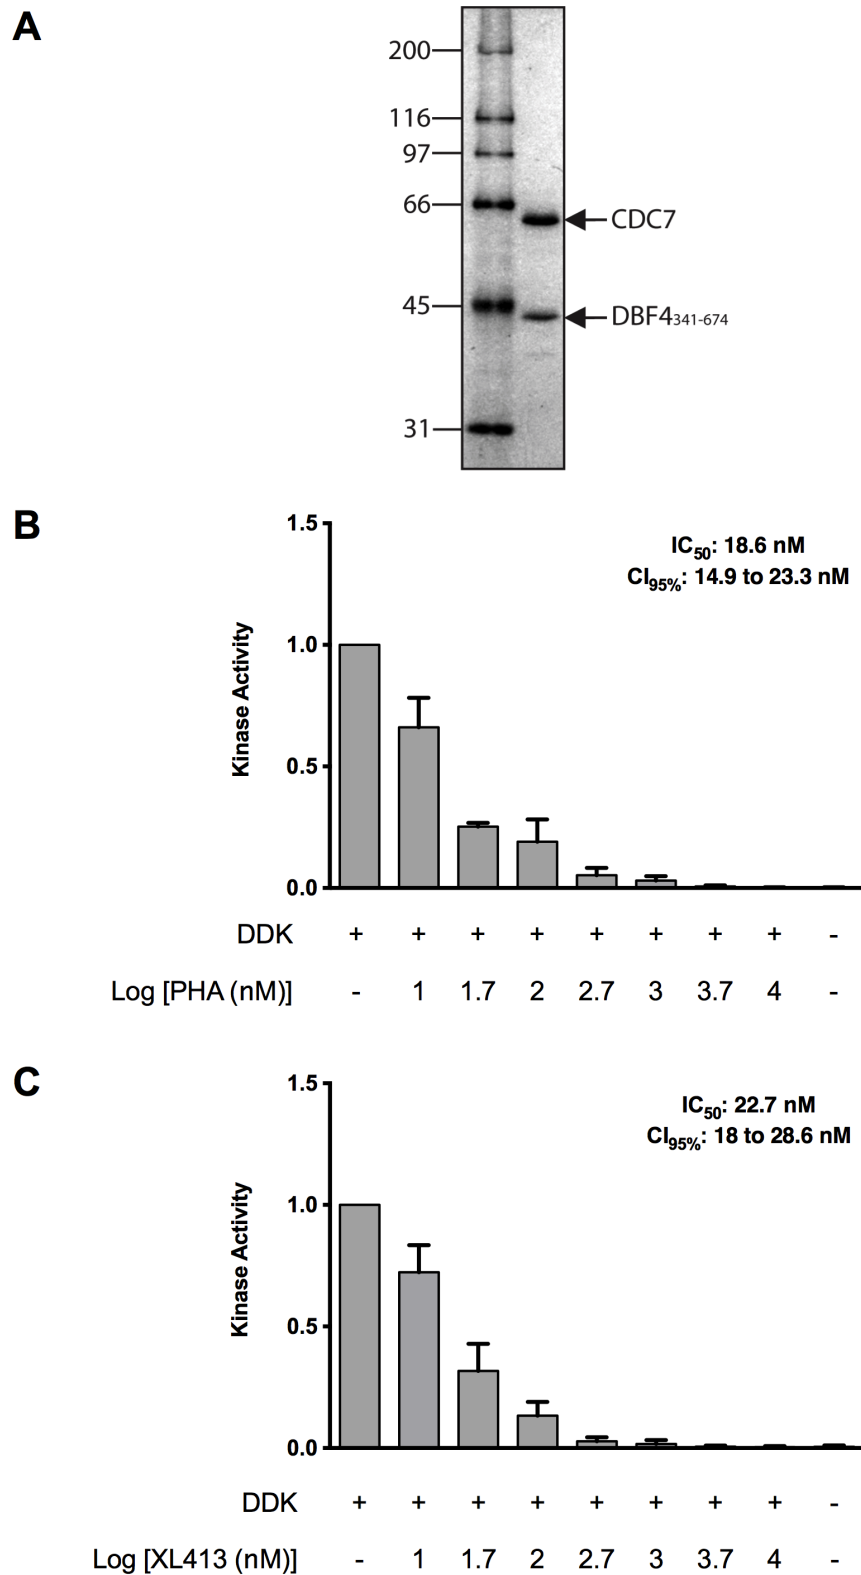

**Figure 4. PHA-767491 and XL413 are similarly effective DDK inhibitors *in vitro*.** (A) Coomassie-stained gel showing 1 µg purified DDK from bacterial cells. ( $\gamma$ )-<sup>32</sup>P ATP DDK kinase assays in presence of increasing concentrations of PHA-767491 (B) or XL413 (C). Kinase activities represent the mean of four independent measurements +/- SD on separate days.  
doi:10.1371/journal.pone.0113300.g004



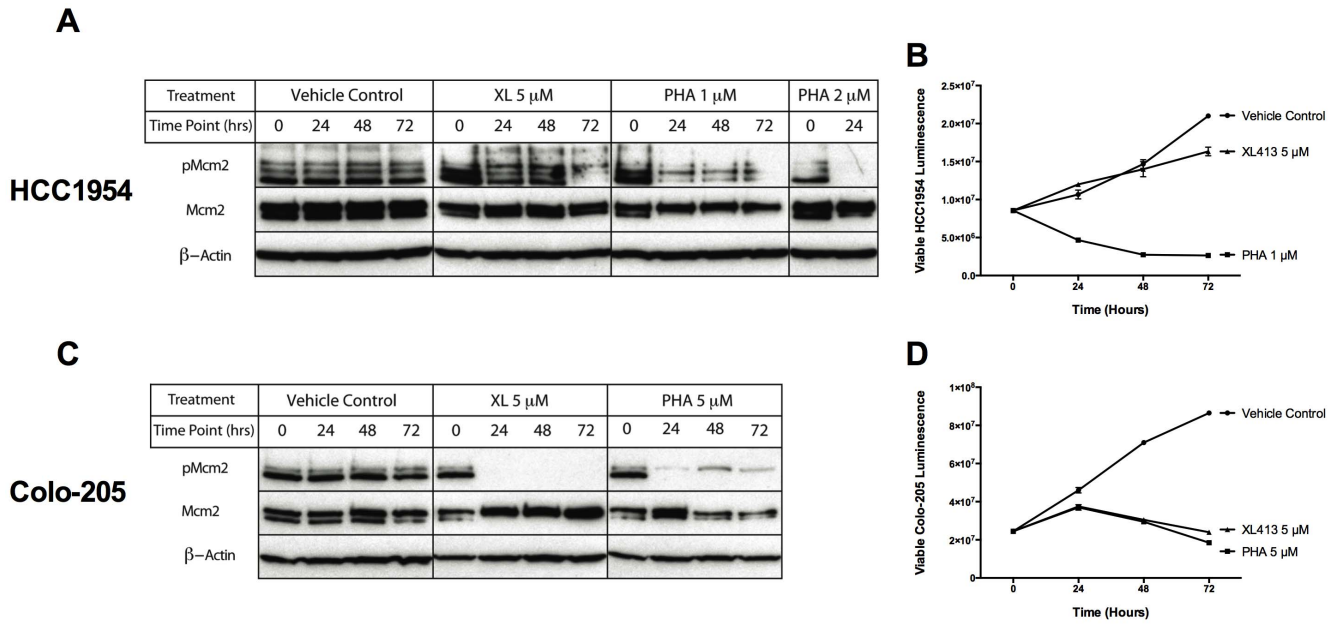

**Figure 5. XL413 is defective in inhibiting DDK-dependent Mcm2 phosphorylation in HCC1954 cells but is effective in Colo-205 cells.** (A) Immunoblots showing Mcm2 phosphorylation in HCC1954 cells or (C) Colo-205 cells in the presence of DMSO, PHA-767491, or XL413. (B) Cell proliferation profile of HCC1954 cells or (D) Colo-205 cells in presence of DMSO, PHA-767491, or XL413. The cell viability data represent the mean of at least two measurements  $\pm$  SD and were highly reproducible on different days. doi:10.1371/journal.pone.0113300.g005

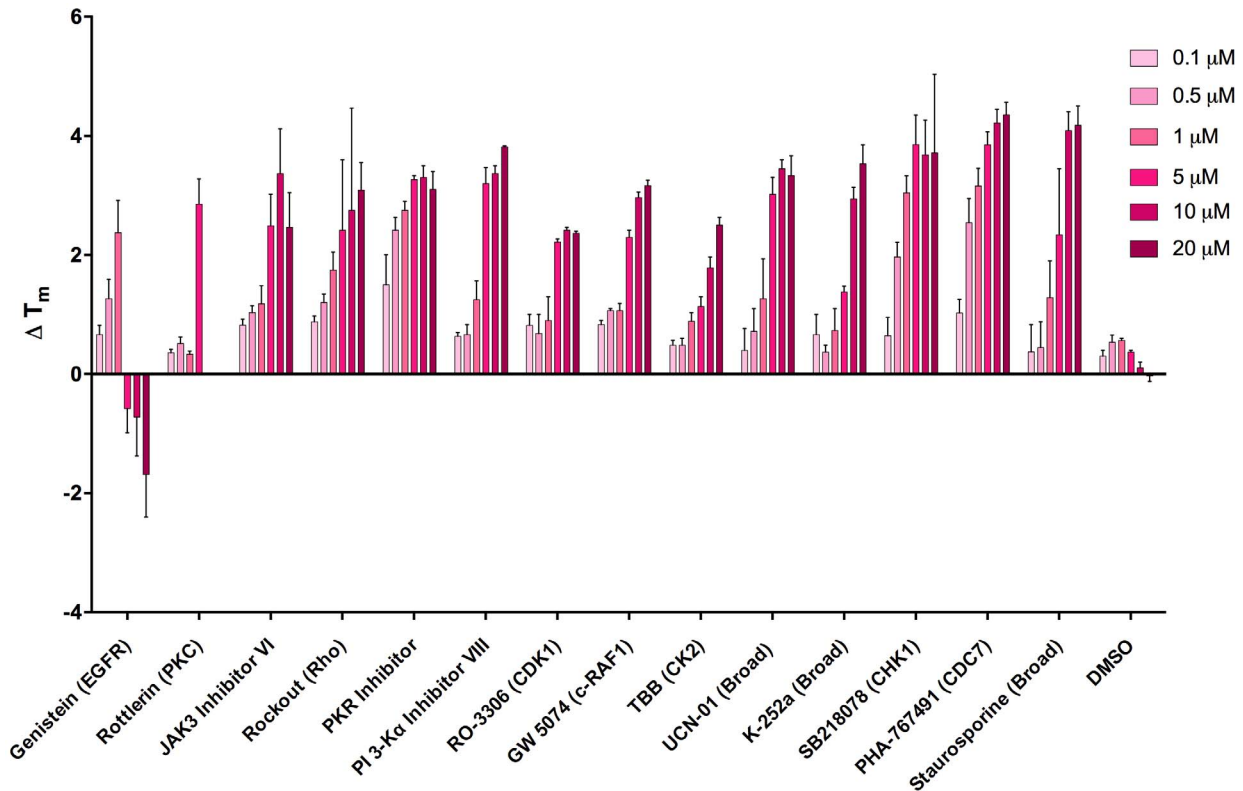

**Figure 6. DDK thermal stability shift assays (TSA) using known kinase inhibitors.** Increasing concentrations of 12 hit compounds discovered in a 400 compound screen (Table S1 in File S1) were screened against purified DDK using the TSA. PHA-767491 (DDK specific inhibitor), staurosporine (broad spectrum kinase inhibitor) and DMSO are shown as controls. The data represent the mean of triplicate measurements  $\pm$  SEM. doi:10.1371/journal.pone.0113300.g006

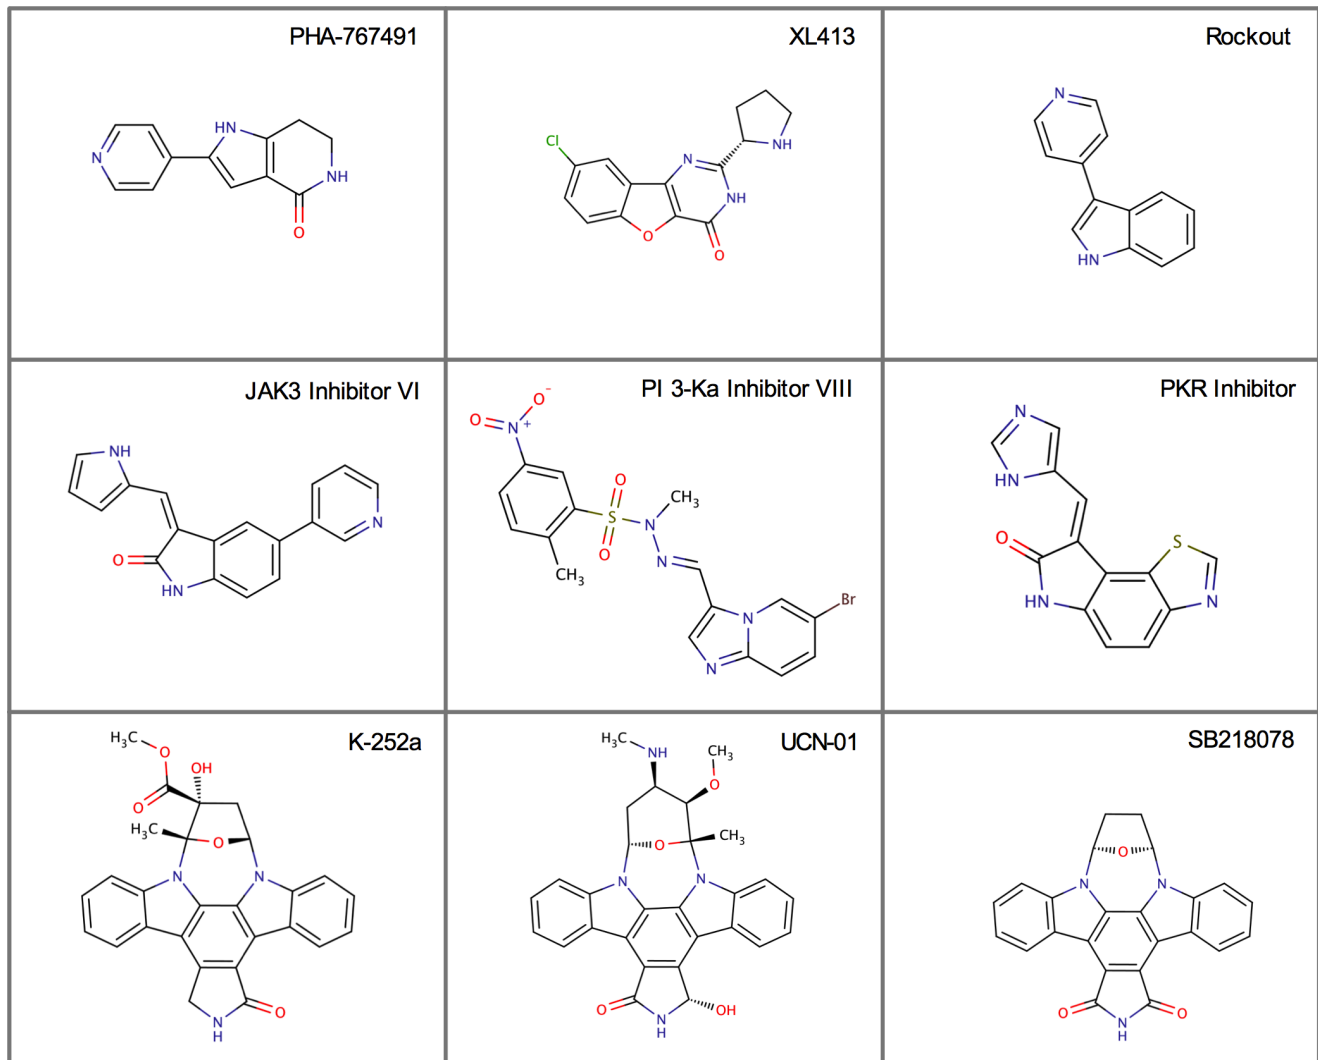

**Figure 7. Structures of potential DDK inhibitors.** The structures of the 7 top compounds from the TSA inhibitor titrations are shown together with PHA-767491 and XL413 structures for comparison (see text and Table S1 in File S1 for further details). Three compounds are derived from staurosporine (bottom row) but the remaining four compounds fall into distinct structural classes.  
doi:10.1371/journal.pone.0113300.g007

compromised activity on cell lines include poor permeability through the cell membrane, degradation by metabolic enzymes, modification to an inactive form, or higher sensitivity to efflux transporters. In principle, these possible deficits could be identified and then circumvented through synthesis of additional chemical derivatives.

Our analysis of XL413 highlights a need for additional biologically active DDK inhibitors. Most ATP competitive inhibitors were optimized by structure activity relationship (SAR) studies on existing scaffolds of chemical inhibitors. PHA-767491 and XL413 were optimized from scaffolds for MK2 and PIM inhibitors, respectively [58,59]. To identify further chemical scaffolds for development of DDK inhibitors, we tested if any well-known kinase inhibitors cross-reacted with human DDK. This is a possibility since ATP-competitive kinase inhibitors bind within a related ATP-binding pocket. Using a TSA screen, we identified 12 small molecules that significantly shifted the thermal stability of DDK. Several of these functioned comparably to PHA-767491 in the assay: the Rho kinase inhibitor (Rockout), the PKR inhibitor, and the Chk1 inhibitor (SB218078). These

compounds fall into different structural classes (Figure 7) indicating that significant chemical space is available for new DDK inhibitor development. Interestingly, UCN-01, also a Chk1 inhibitor related to staurosporine [60], was also identified in our screen and showed a high affinity for DDK. This raises the possibility that more potent and selective derivatives of staurosporine might be designed against DDK. It also raises the possibility that reported biological effects due to Chk1 inhibition may be enhanced by the ability of SB218078 and/or UCN-01 to also inhibit DDK. Rockout is a pyridine-substituted indole derivative and so is somewhat related to PHA-767491. However, the position of the pyridine moiety on the indole ring of Rockout is quite different from the geometry of PHA-767491. The PKR inhibitor also falls into a distinct structural class from either PHA-767491 or XL413.

It was noteworthy that the PKR inhibitor blocked the growth of HCC1954 breast cancer cells, induced apoptosis, and inhibited DDK-mediated Mcm2 phosphorylation nearly as well as the lead DDK inhibitor PHA-767491. RNA-dependent protein kinase (or PKR) is ubiquitously expressed protein that blocks protein

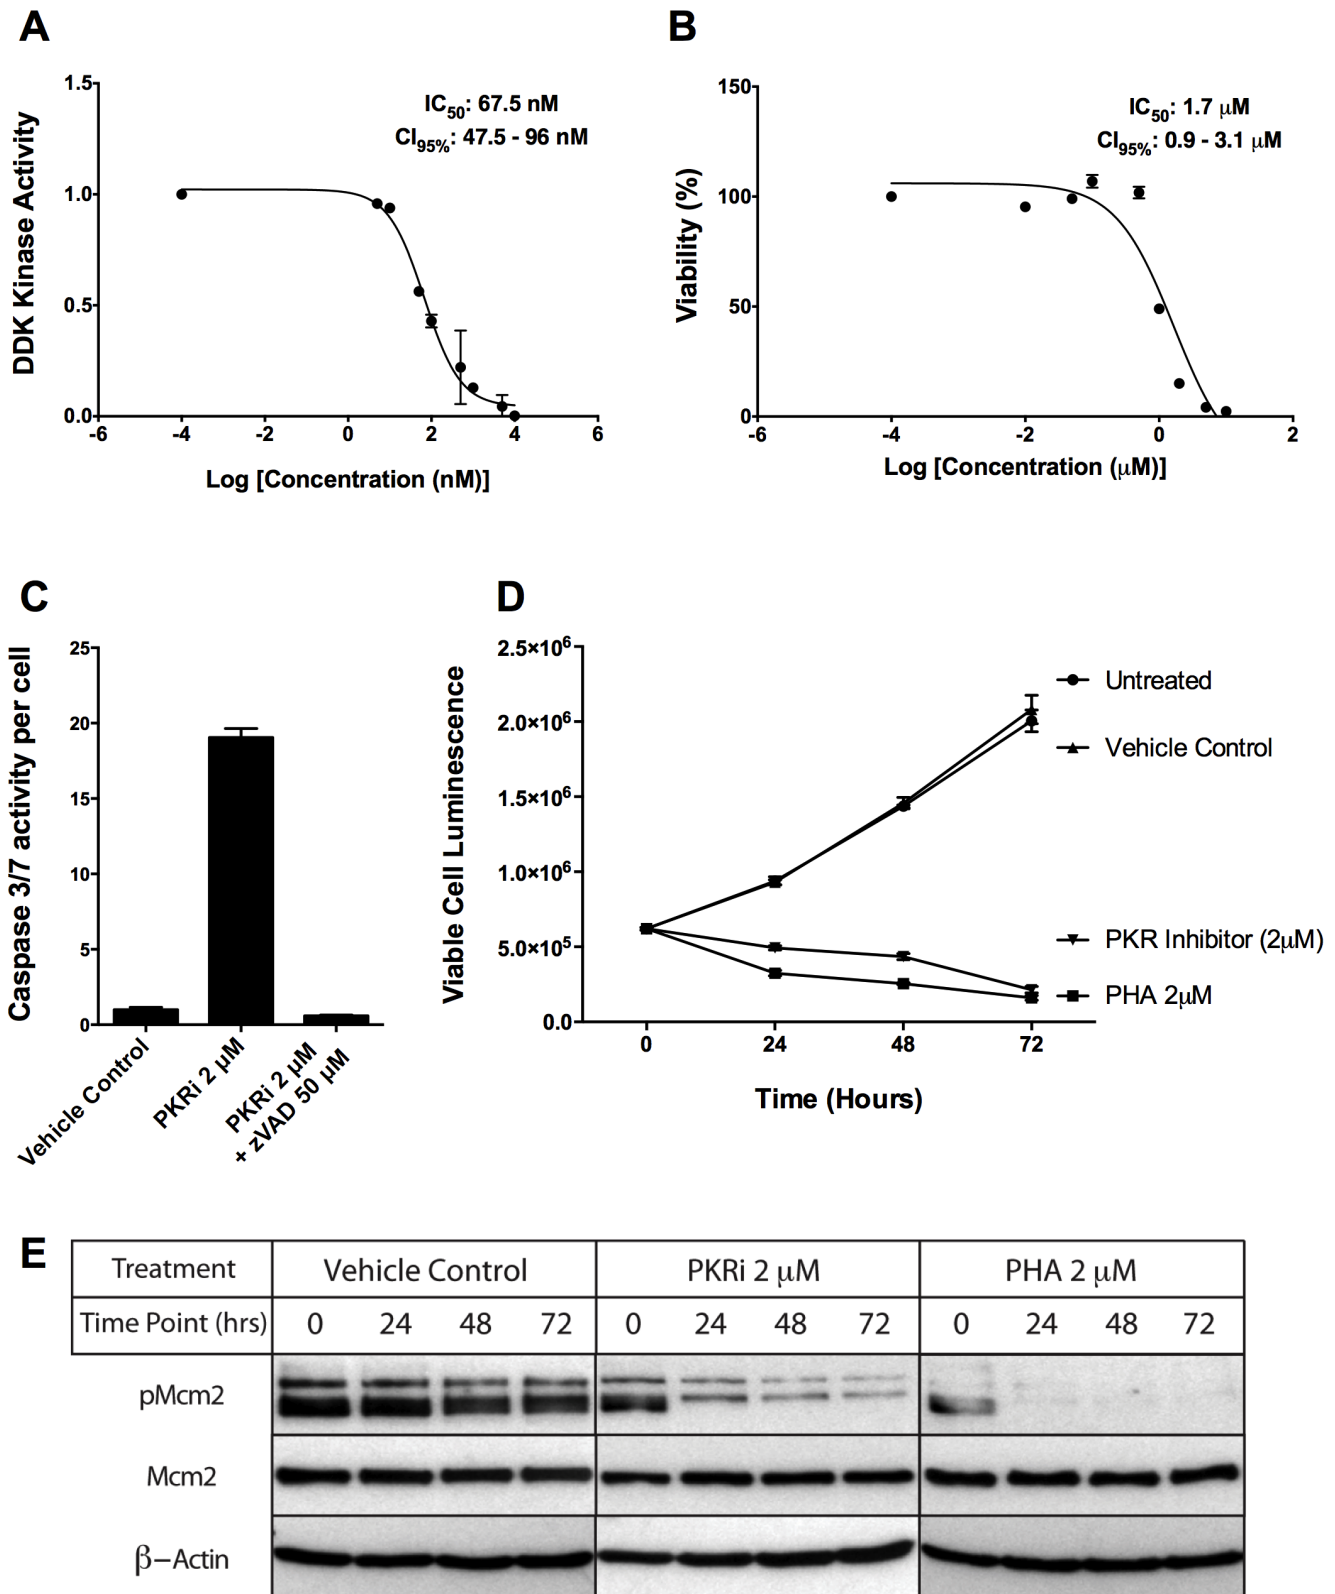

**Figure 8. A PKR inhibitor also inhibits DDK activity and induces apoptosis in breast cancer cells.**  $IC_{50}$  values for the PKR inhibitor (shown in Figure 7) were determined against purified DDK (A) and HCC1954 cells (B). (C) Caspase 3/7 assays showing that apoptosis was strongly induced at 24 hours following PKR inhibitor addition and this was eliminated using the pan-caspase inhibitor z-VAD. The PKR inhibitor causes a similar decrease in viability on HCC1954 cells to PHA-767491 over time (D) and also inhibits Mcm2 phosphorylation in cells, a known DDK target (E). The measurements in panels A–D represent the averages of at least two measurements  $\pm$  SD and were highly reproducible. doi:10.1371/journal.pone.0113300.g008

synthesis in response to a number of stresses and impacts both neurodegenerative diseases and cancer through its ability to promote apoptosis [61]. The particular PKR inhibitor we used inhibited PKR with an  $IC_{50}$  of 210 nM [62] but inhibited DDK with an  $IC_{50}$  of ~70 nM *in vitro* (Figure 8A), and so should be classified as a dual PKR/DDK inhibitor. Whether the PKR inhibitor induced apoptosis in HCC1954 cells due to inhibiting DDK activity, PKR activity or both remains to be determined. In summary, our results highlight the cross-reactivity of several kinase inhibitors with DDK and also reveal an opportunity to develop more potent, biologically active DDK inhibitors for future evaluation.

## Supporting Information

**File S1 Supporting files. Figure S1**, Two DDK inhibitors, PHA-767491 and XL413, exhibit differential activity against cultured HCT116 colon cancer cells. To determine the  $IC_{50}$ , HCT116 (p53<sup>+/+</sup>) cells were treated with increasing concentrations of PHA-767491 or XL413 (A) and the cell viability was measured 72 hrs post drug addition. HCT116 (p53<sup>-/-</sup>) cells were treated with increasing concentrations of PHA-767491 or XL413 (B) and the cell viability was measured 72 hrs post drug addition. All data represent the mean of at least three separate measurements  $\pm$  SD. **Figure S2**, DDK thermal stability shift assays (TSA) screen using 400 known kinase inhibitors. **Figure S3**, Top hits identified by TSA screen inhibit DDK *in vitro*. ( $\gamma$ )-<sup>32</sup>P ATP DDK kinase assays in presence of increasing concentrations of SB 218078 (A), PKR Inhibitor (B), UCN-01 (C), JAK3 Inhibitor VI (D), Rho Kinase Inhibitor III (E), and PI3-K $\alpha$  Inhibitor VIII (F). Kinase activities represent the mean of two independent measurements  $\pm$  SD on separate days. **Figure S4**, The Chk1 inhibitor (SB 218078) inhibits DDK activity and induces low levels

of apoptosis in breast cancer cells.  $IC_{50}$  values for SB 218078 (structure shown in Figure 7) were determined against purified DDK (A) and HCC1954 cells (B). Caspase 3/7 assays show that low levels of apoptosis were induced at 24 hours following SB 218078 addition and this was eliminated using the pan-caspase inhibitor z-VAD (C). SB 218078 induces cell growth arrest in HCC1954 cells over time (D) and also modestly inhibits Mcm2 phosphorylation in cells, a known DDK target (E). The measurements in panels A-D represent the averages of at least two measurements  $\pm$  SD and were highly reproducible. **Figure S5**, XL413 acquired from the commercial supplier (MedKoo Biosciences, North Carolina) behaved similar to the chemically synthesized compound. To determine the  $IC_{50}$  values, HCC1954 and Colo-205 cells were treated with increasing concentrations of XL413 (MedKoo) and the cell viability was measured 72 hrs post drug addition. All data represent the mean of at least three separate measurements  $\pm$  SD and were highly reproducible on separate days. **Table S1**, Characteristics of top kinase inhibitors discovered in TSA screen. (PDF)

## Acknowledgments

We thank Dr. Bert Vogelstein for the isogenic HCT116 p53<sup>+/+</sup> and p53<sup>-/-</sup> cell lines and Fujung Chang for technical support.

## Author Contributions

Conceived and designed the experiments: NKS TW KM HEX MW. Performed the experiments: NKS KT FFS DB. Analyzed the data: NKS KT FFS DB TW KM HEX MW. Contributed reagents/materials/analysis tools: NKS KT FFS DB TW KM HEX MW. Wrote the paper: NKS MW.

## References

- Labib K (2010) How do Cdc7 and cyclin-dependent kinases trigger the initiation of chromosome replication in eukaryotic cells? *Genes Dev* 24: 1208–1219.
- Hardy CF, Dryga O, Seematter S, Pahl PM, Sclafani RA (1997) mcm5/cdc46-bob1 bypasses the requirement for the S phase activator Cdc7p. *Proc Natl Acad Sci U S A* 94: 3151–3155.
- Hoang ML, Leon RP, Pessoa-Brandao L, Hunt S, Raghuraman MK, et al. (2007) Structural changes in Mcm5 protein bypass Cdc7-Dbf4 function and reduce replication origin efficiency in *Saccharomyces cerevisiae*. *Mol Cell Biol* 27: 7594–7602.
- Takahashi TS, Basu A, Bermudez V, Hurwitz J, Walter JC (2008) Cdc7-Drf1 kinase links chromosome cohesion to the initiation of DNA replication in *Xenopus* egg extracts. *Genes Dev* 22: 1894–1905.
- Matos J, Lipp JJ, Bogdanova A, Guillot S, Okaz E, et al. (2008) Dbf4-dependent CDC7 kinase links DNA replication to the segregation of homologous chromosomes in meiosis I. *Cell* 135: 662–678.
- Sasanuma H, Hirota K, Fukuda T, Kakusho N, Kugou K, et al. (2008) Cdc7-dependent phosphorylation of Mer2 facilitates initiation of yeast meiotic recombination. *Genes Dev* 22: 398–410.
- Wan L, Niu H, Futcher B, Zhang C, Shokat KM, et al. (2008) Cdc28-Clb5 (CDK-S) and Cdc7-Dbf4 (DDK) collaborate to initiate meiotic recombination in yeast. *Genes Dev* 22: 386–397.
- Day TA, Palle K, Barkley LR, Kakusho N, Zou Y, et al. (2010) Phosphorylated Rad18 directs DNA polymerase  $\eta$  to sites of stalled replication. *J Cell Biol* 191: 953–966.
- Yamada M, Watanabe K, Mistrik M, Vesela E, Protivankova I, et al. (2013) ATR-Chk1-APC/CCdh1-dependent stabilization of Cdc7-ASK (Dbf4) kinase is required for DNA lesion bypass under replication stress. *Genes Dev* 27: 2459–2472.
- Jiang W, McDonald D, Hope TJ, Hunter T (1999) Mammalian Cdc7-Dbf4 protein kinase complex is essential for initiation of DNA replication. *EMBO J* 18: 5703–5713.
- Kumagai H, Sato N, Yamada M, Mahony D, Seghezzi W, et al. (1999) A novel growth- and cell cycle-regulated protein, ASK, activates human Cdc7-related kinase and is essential for G1/S transition in mammalian cells. *Mol Cell Biol* 19: 5083–5095.
- Oshiro G, Owens JC, Shellman Y, Sclafani RA, Li JJ (1999) Cell cycle control of Cdc7p kinase activity through regulation of Dbf4p stability. *Mol Cell Biol* 19: 4888–4896.
- Weinreich M, Stillman B (1999) Cdc7p-Dbf4p kinase binds to chromatin during S phase and is regulated by both the APC and the RAD53 checkpoint pathway. *EMBO J* 18: 5334–5346.
- Ferreira MF, Santocanale C, Drury LS, Diffley JF (2000) Dbf4p, an essential S phase-promoting factor, is targeted for degradation by the anaphase-promoting complex. *Mol Cell Biol* 20: 242–248.
- Kitamura R, Fukatsu R, Kakusho N, Cho YS, Taniyama C, et al. (2011) Molecular mechanism of activation of human Cdc7 kinase: bipartite interaction with Dbf4/activator of S phase kinase (ASK) activation subunit stimulates ATP binding and substrate recognition. *J Biol Chem* 286: 23031–23043.
- Hughes S, Elustondo F, Di Fonzo A, Leroux FG, Wong AC, et al. (2012) Crystal structure of human CDC7 kinase in complex with its activator DBF4. *Nat Struct Mol Biol* 19: 1101–1107.
- Huse M, Kuriyan J (2002) The conformational plasticity of protein kinases. *Cell* 109: 275–282.
- Harkins V, Gabrielse C, Haste L, Weinreich M (2009) Budding yeast Dbf4 sequences required for Cdc7 kinase activation and identification of a functional relationship between the Dbf4 and Rev1 BRCT domains. *Genetics* 183: 1269–1282.
- Ogino K, Takeda T, Matsui E, Iiyama H, Taniyama C, et al. (2001) Bipartite binding of a kinase activator activates Cdc7-related kinase essential for S phase. *J Biol Chem* 276: 31376–31387.
- Fung AD, Ou J, Bueler S, Brown GW (2002) A conserved domain of *Schizosaccharomyces pombe* dfp1(+) is uniquely required for chromosome stability following alkylation damage during S phase. *Mol Cell Biol* 22: 4477–4490.
- Sato N, Sato M, Nakayama M, Saitoh R, Arai K, et al. (2003) Cell cycle regulation of chromatin binding and nuclear localization of human Cdc7-ASK kinase complex. *Genes Cells* 8: 451–463.
- Cho WH, Lee YJ, Kong SI, Hurwitz J, Lee JK (2006) CDC7 kinase phosphorylates serine residues adjacent to acidic amino acids in the minichromosome maintenance 2 protein. *Proc Natl Acad Sci U S A* 103: 11521–11526.
- Masai H, Taniyama C, Ogino K, Matsui E, Kakusho N, et al. (2006) Phosphorylation of MCM4 by Cdc7 kinase facilitates its interaction with Cdc45 on the chromatin. *J Biol Chem* 281: 39249–39261.

24. Montagnoli A, Valsasina B, Brotherton D, Troiani S, Rainoldi S, et al. (2006) Identification of Mcm2 phosphorylation sites by S-phase-regulating kinases. *J Biol Chem* 281: 10281–10290.
25. Ramer MD, Suman ES, Richter H, Stanger K, Spranger M, et al. (2013) Dbf4 and Cdc7 proteins promote DNA replication through interactions with distinct Mcm2-7 protein subunits. *J Biol Chem* 288: 14926–14935.
26. Bonte D, Lindvall C, Liu H, Dykema K, Furge K, et al. (2008) Cdc7-Dbf4 kinase overexpression in multiple cancers and tumor cell lines is correlated with p53 inactivation. *Neoplasia* 10: 920–931.
27. Cheng AN, Jiang SS, Fan CC, Lo YK, Kuo CY, et al. (2013) Increased Cdc7 expression is a marker of oral squamous cell carcinoma and overexpression of Cdc7 contributes to the resistance to DNA-damaging agents. *Cancer Lett* 337: 218–225.
28. Chen HJ, Zhu Z, Wang XL, Feng QL, Wu Q, et al. (2013) Expression of huCdc7 in colorectal cancer. *World J Gastroenterol* 19: 3130–3133.
29. Hou Y, Wang HQ, Ba Y (2012) High expression of cell division cycle 7 protein correlates with poor prognosis in patients with diffuse large B-cell lymphoma. *Med Oncol* 29: 3498–3503.
30. Hou Y, Wang HQ, Ba Y (2012) Effects of CDC7 gene silencing and Rituximab on apoptosis in diffuse large B cell lymphoma cells. *J Cancer Res Clin Oncol* 138: 2027–2034.
31. Malumbres M (2011) Physiological relevance of cell cycle kinases. *Physiol Rev* 91: 973–1007.
32. Montagnoli A, Moll J, Colotta F (2010) Targeting cell division cycle 7 kinase: a new approach for cancer therapy. *Clin Cancer Res* 16: 4503–4508.
33. Choschzick M, Lebeau A, Marx AH, Tharun L, Terracciano L, et al. (2010) Overexpression of cell division cycle 7 homolog is associated with gene amplification frequency in breast cancer. *Hum Pathol* 41: 358–365.
34. Kulkarni AA, Kingsbury SR, Tudzarova S, Hong HK, Loddo M, et al. (2009) Cdc7 kinase is a predictor of survival and a novel therapeutic target in epithelial ovarian carcinoma. *Clin Cancer Res* 15: 2417–2425.
35. Fluge O, Bruland O, Akslen LA, Lillehaug JR, Varhaug JE (2006) Gene expression in poorly differentiated papillary thyroid carcinomas. *Thyroid* 16: 161–175.
36. Montagnoli A, Tenca P, Sola F, Carpani D, Brotherton D, et al. (2004) Cdc7 inhibition reveals a p53-dependent replication checkpoint that is defective in cancer cells. *Cancer Res* 64: 7110–7116.
37. Im JS, Lee JK (2008) ATR-dependent activation of p38 MAP kinase is responsible for apoptotic cell death in cells depleted of Cdc7. *J Biol Chem* 283: 25171–25177.
38. Tudzarova S, Trotter MW, Wollenschlaeger A, Mulvey C, Godovac-Zimmermann J, et al. (2010) Molecular architecture of the DNA replication origin activation checkpoint. *EMBO J* 29: 3381–3394.
39. Ito S, Ishii A, Kakusho N, Taniyama C, Yamazaki S, et al. (2012) Mechanism of cancer cell death induced by depletion of an essential replication regulator. *PLoS One* 7: e36372.
40. Shreeram S, Sparks A, Lane DP, Blow JJ (2002) Cell type-specific responses of human cells to inhibition of replication licensing. *Oncogene* 21: 6624–6632.
41. Feng D, Tu Z, Wu W, Liang C (2003) Inhibiting the expression of DNA replication-initiation proteins induces apoptosis in human cancer cells. *Cancer Res* 63: 7356–7364.
42. Vanotti E, Amici R, Bargiotti A, Berthelsen J, Bosotti R, et al. (2008) Cdc7 kinase inhibitors: pyrrolopyridinones as potential antitumor agents. 1. Synthesis and structure-activity relationships. *J Med Chem* 51: 487–501.
43. Montagnoli A, Valsasina B, Croci V, Menichincheri M, Rainoldi S, et al. (2008) A Cdc7 kinase inhibitor restricts initiation of DNA replication and has antitumor activity. *Nat Chem Biol* 4: 357–365.
44. Natori A, Murillo LS, Kliszczak AE, Catherwood MA, Montagnoli A, et al. (2011) Mechanisms of action of a dual Cdc7/Cdk9 kinase inhibitor against quiescent and proliferating CLL cells. *Mol Cancer Ther* 10: 1624–1634.
45. Natori A, Coyne MR, Jacobsen A, Rainey MD, O'Brien G, et al. (2013) Characterization of a Dual CDC7/CDK9 Inhibitor in Multiple Myeloma Cellular Models. *Cancers (Basel)* 5: 901–918.
46. Menichincheri M, Bargiotti A, Berthelsen J, Bertrand JA, Bossi R, et al. (2009) First Cdc7 kinase inhibitors: pyrrolopyridinones as potent and orally active antitumor agents. 2. Lead discovery. *J Med Chem* 52: 293–307.
47. Ermoli A, Bargiotti A, Brasca MG, Ciavolella A, Colombo N, et al. (2009) Cell division cycle 7 kinase inhibitors: 1H-pyrrolo[2,3-b]pyridines, synthesis and structure-activity relationships. *J Med Chem* 52: 4380–4390.
48. Menichincheri M, Albanese C, Alli C, Ballinari D, Bargiotti A, et al. (2010) Cdc7 kinase inhibitors: 5-heteroaryl-3-carboxamido-2-aryl pyrroles as potential antitumor agents. 1. Lead finding. *J Med Chem* 53: 7296–7315.
49. Koltun ES, Tshako AL, Brown DS, Aay N, Arcalas A, et al. (2012) Discovery of XL413, a potent and selective CDC7 inhibitor. *Bioorg Med Chem Lett* 22: 3727–3731.
50. Niesen FH, Berglund H, Vedadi M (2007) The use of differential scanning fluorimetry to detect ligand interactions that promote protein stability. *Nat Protoc* 2: 2212–2221.
51. Tapley P, Lamballe F, Barbacid M (1992) K252a is a selective inhibitor of the tyrosine protein kinase activity of the trk family of oncogenes and neurotrophin receptors. *Oncogene* 7: 371–381.
52. Kase H, Iwahashi K, Matsuda Y (1986) K-252a, a potent inhibitor of protein kinase C from microbial origin. *J Antibiot (Tokyo)* 39: 1059–1065.
53. Jackson JR, Gilmartin A, Imburgia C, Winkler JD, Marshall LA, et al. (2000) An indolocarbazole inhibitor of human checkpoint kinase (Chk1) abrogates cell cycle arrest caused by DNA damage. *Cancer Res* 60: 566–572.
54. Zhang J, Yang PL, Gray NS (2009) Targeting cancer with small molecule kinase inhibitors. *Nat Rev Cancer* 9: 28–39.
55. Workman P, Collins I (2010) Probing the probes: fitness factors for small molecule tools. *Chem Biol* 17: 561–577.
56. Lipinski CA (2004) Lead- and drug-like compounds: the rule-of-five revolution. *Drug Discovery Today: Technologies* 1: 337–341.
57. Weiss WA, Taylor SS, Shokat KM (2007) Recognizing and exploiting differences between RNAi and small-molecule inhibitors. *Nat Chem Biol* 3: 739–744.
58. Tshako AL, Brown DS, Koltun ES, Aay N, Arcalas A, et al. (2012) The design, synthesis, and biological evaluation of PIM kinase inhibitors. *Bioorg Med Chem Lett* 22: 3732–3738.
59. Anderson DR, Meyers MJ, Vernier WF, Mahoney MW, Kurumbail RG, et al. (2007) Pyrrolopyridine inhibitors of mitogen-activated protein kinase-activated protein kinase 2 (MK-2). *J Med Chem* 50: 2647–2654.
60. Graves PR, Yu L, Schwarz JK, Gales J, Sausville EA, et al. (2000) The Chk1 protein kinase and the Cdc25C regulatory pathways are targets of the anticancer agent UCN-01. *J Biol Chem* 275: 5600–5605.
61. Marchal JA, Lopez GJ, Peran M, Comino A, Delgado JR, et al. (2014) The impact of PKR activation: from neurodegeneration to cancer. *FASEB J* 28: 1965–1974.
62. Jammi NV, Whitby LR, Beal PA (2003) Small molecule inhibitors of the RNA-dependent protein kinase. *Biochem Biophys Res Commun* 308: 50–57.
63. Zhao C, Tovar C, Yin X, Xu Q, Todorov IT, et al. (2009) Synthesis and evaluation of pyrido-thieno-pyrimidines as potent and selective Cdc7 kinase inhibitors. *Bioorg Med Chem Lett* 19: 319–323.
64. Bryan MC, Falsey JR, Frohn M, Reichelt A, Yao G, et al. (2013) N-substituted azaindoles as potent inhibitors of Cdc7 kinase. *Bioorg Med Chem Lett* 23: 2056–2060.
